# Supplementary figures and images for: Construction of macrocyclic thiodepsipeptides: synthesis of a nosiheptide ‘southern hemisphere’ model system
Source: Royal Society of Chemistry journal article supplement (doi:10.1039/b715644h), 2007-11-23

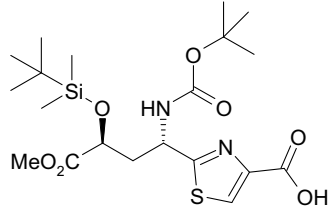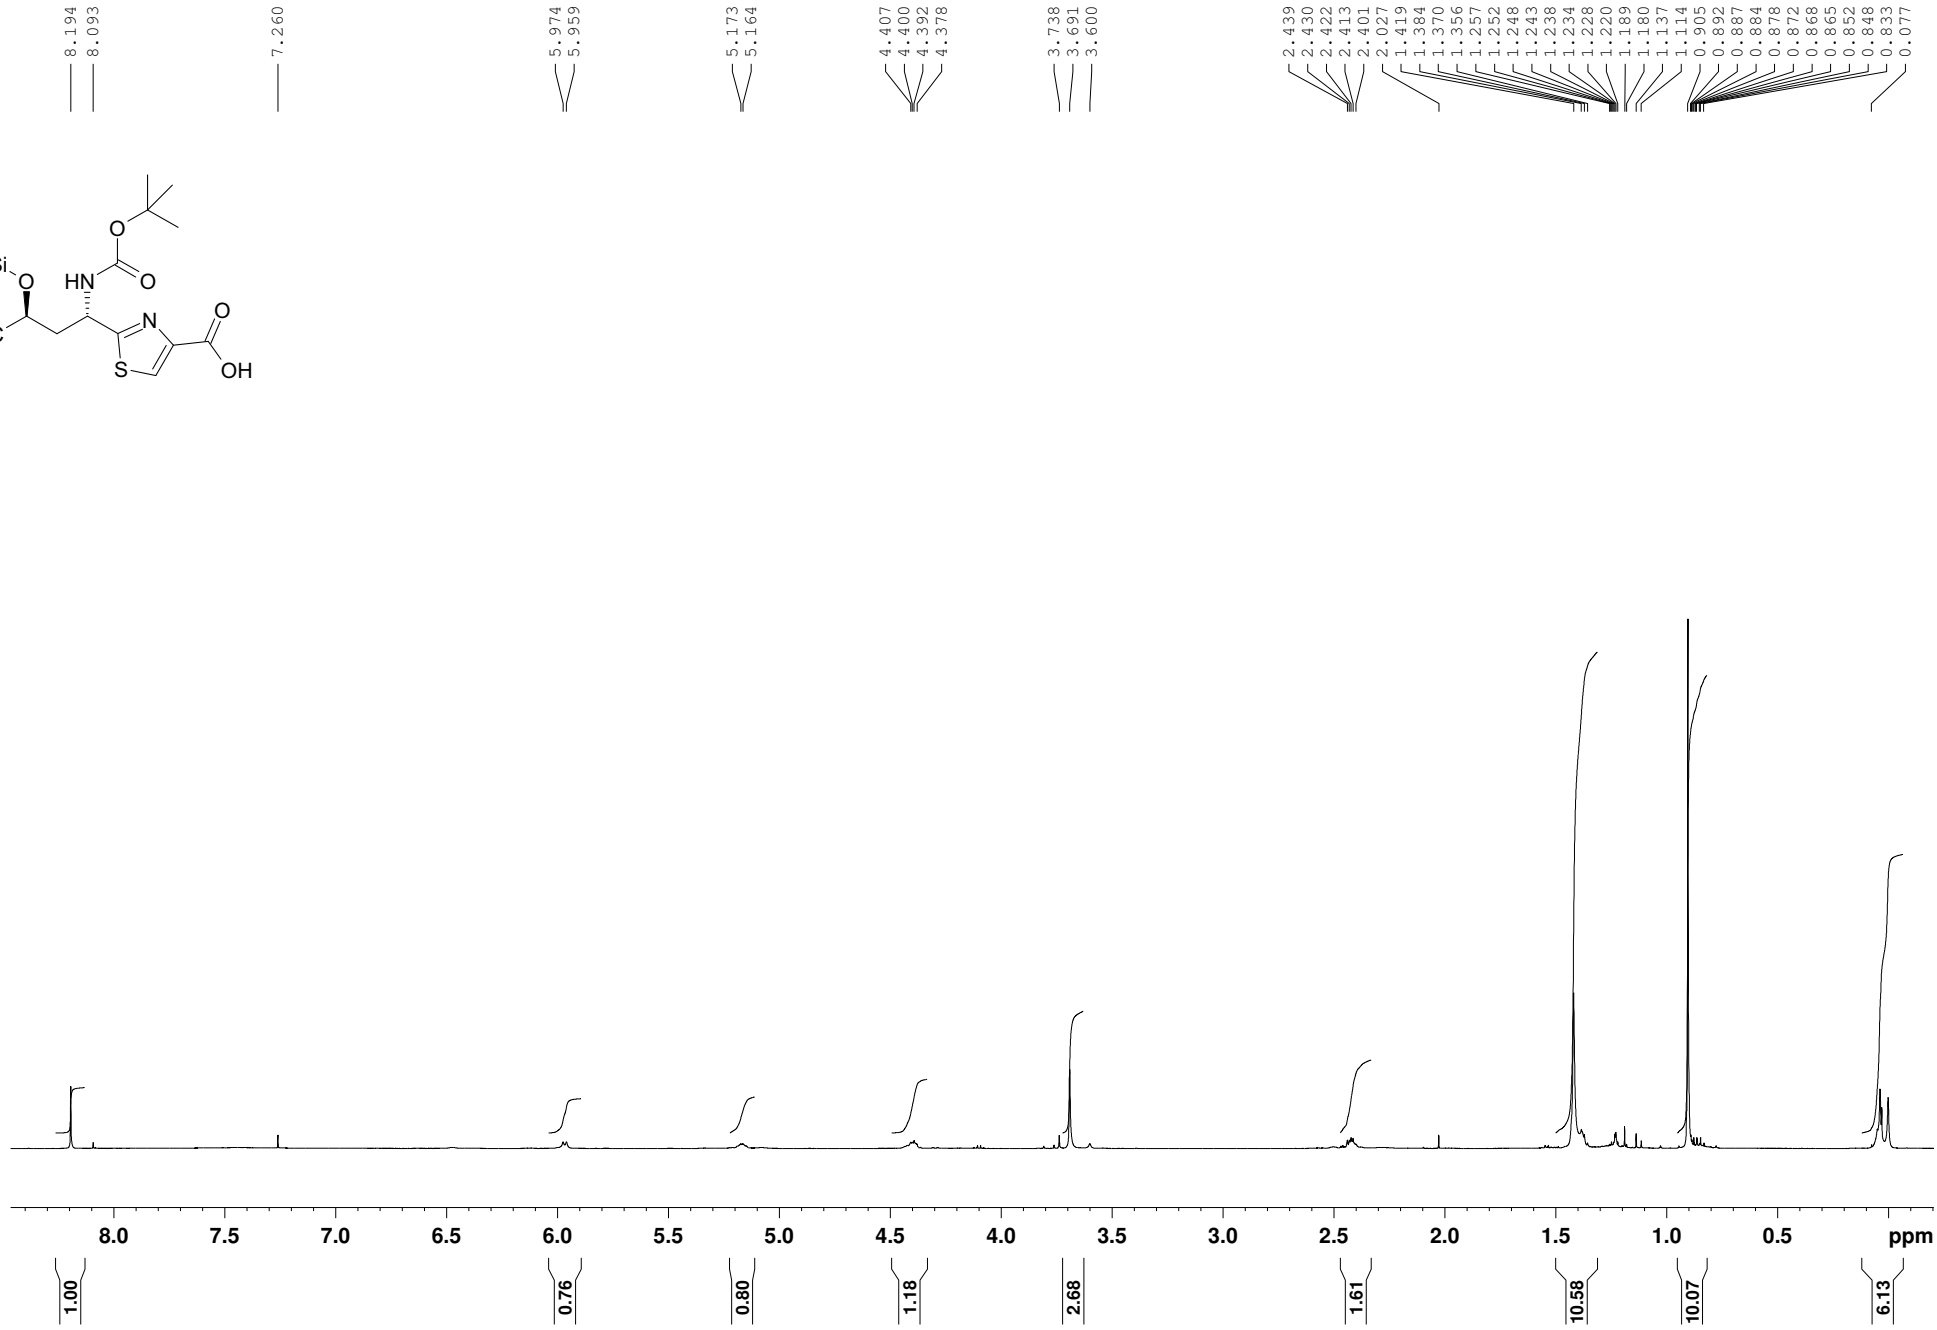

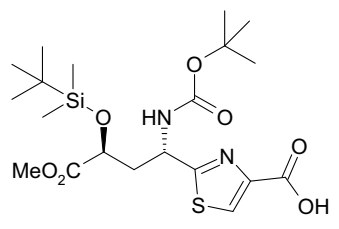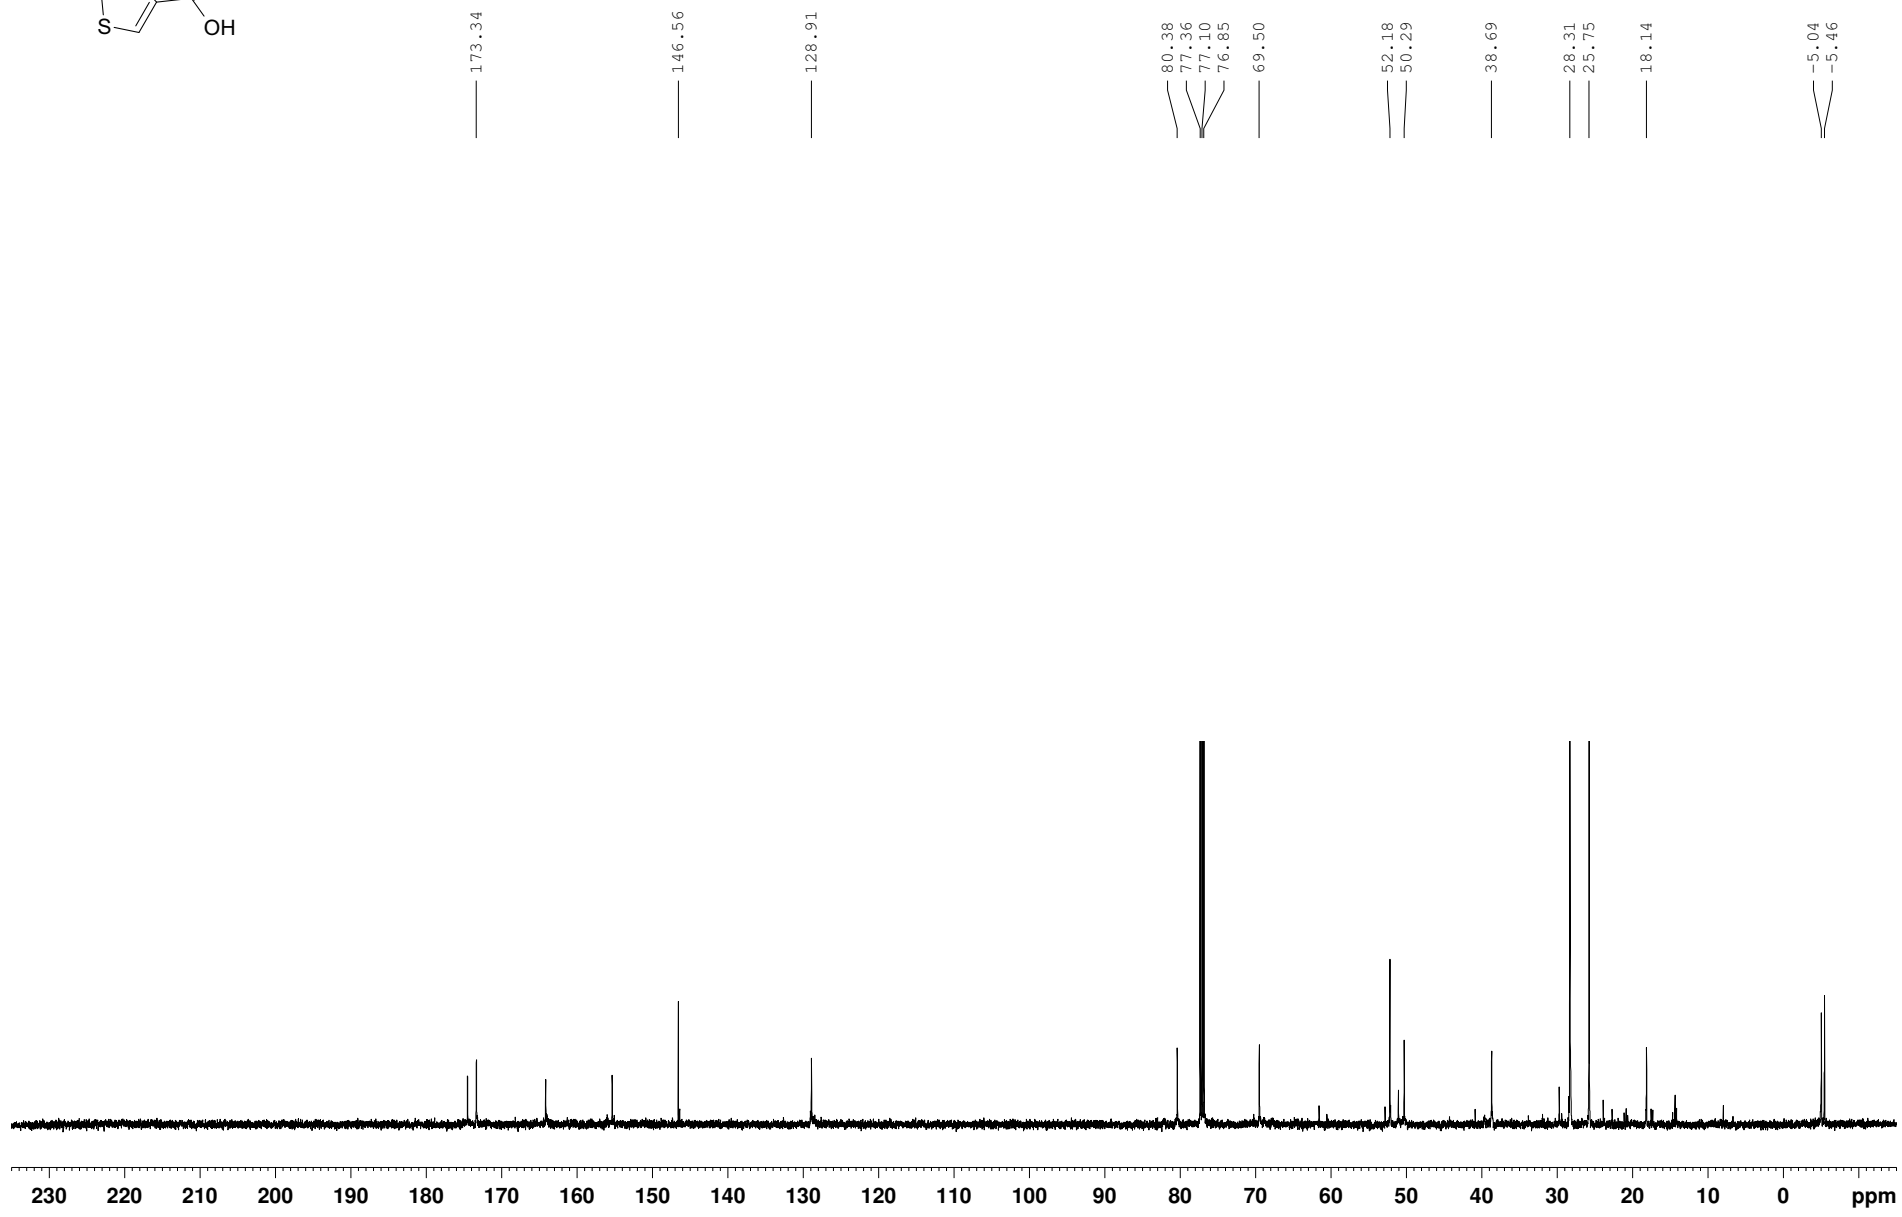

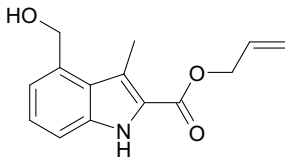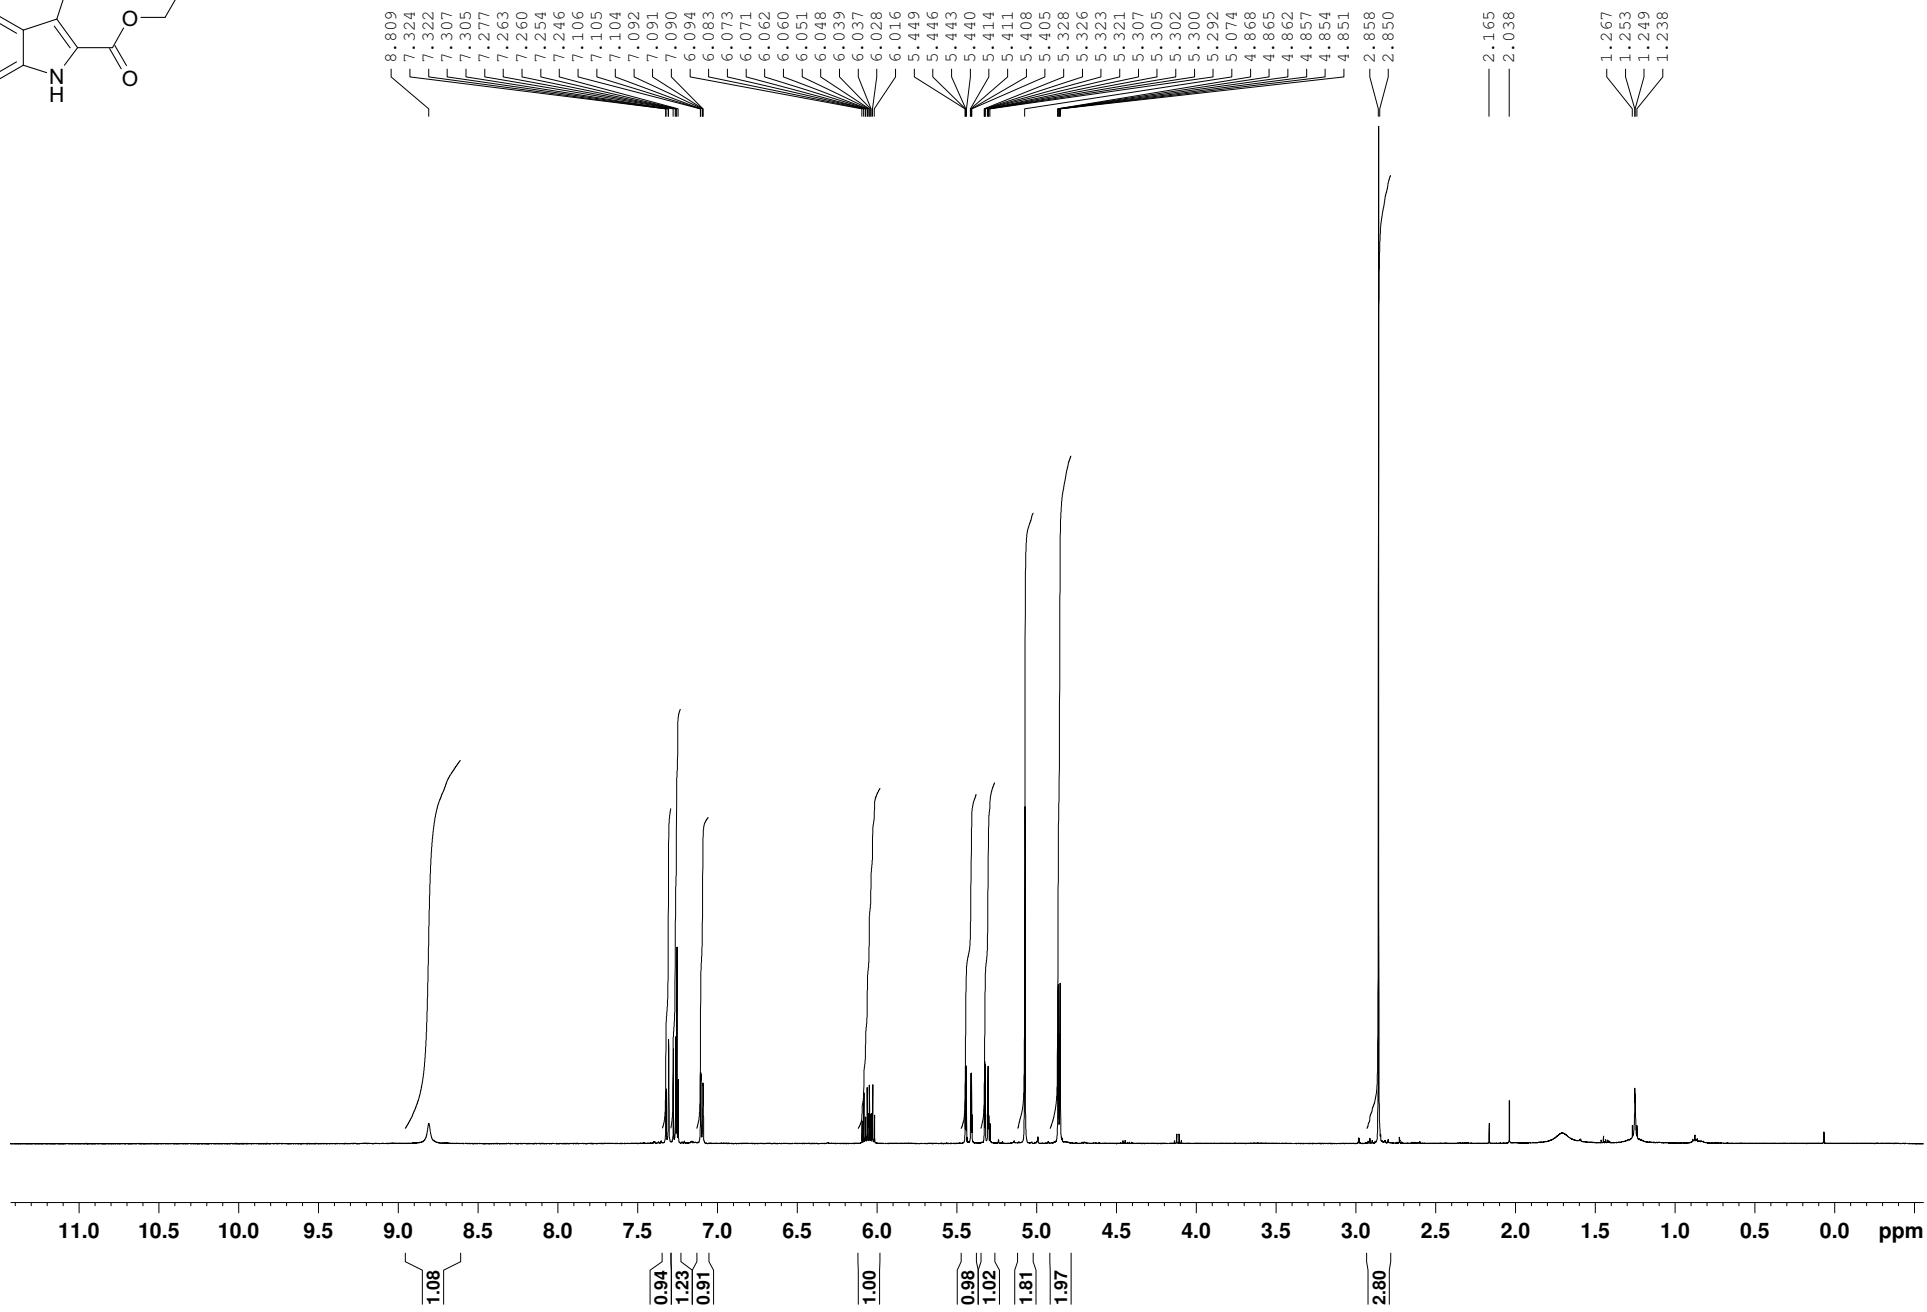

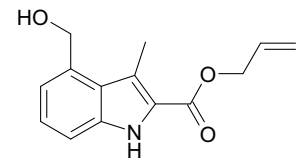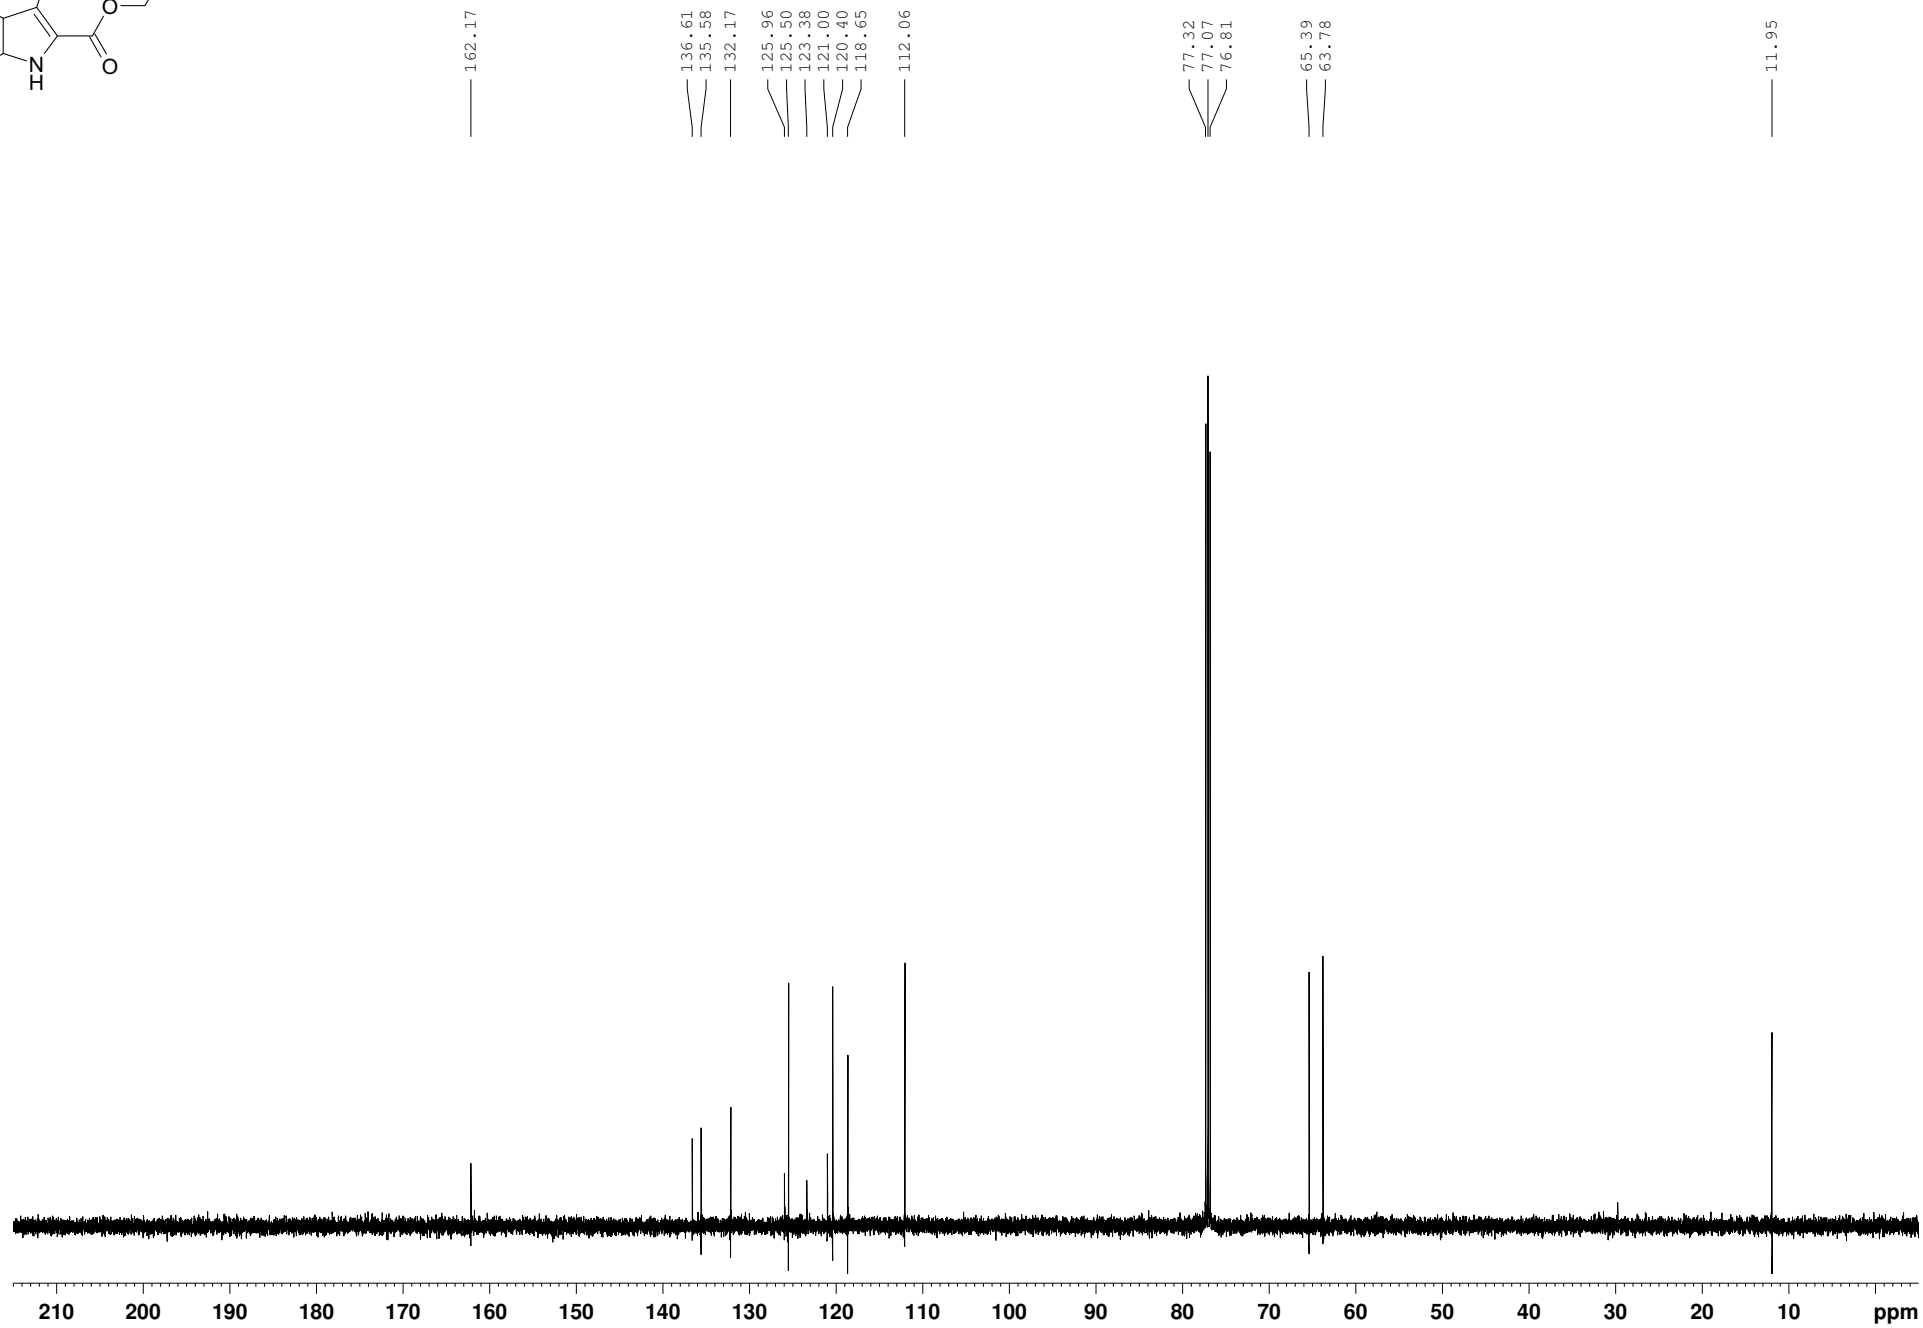

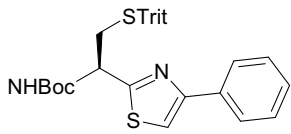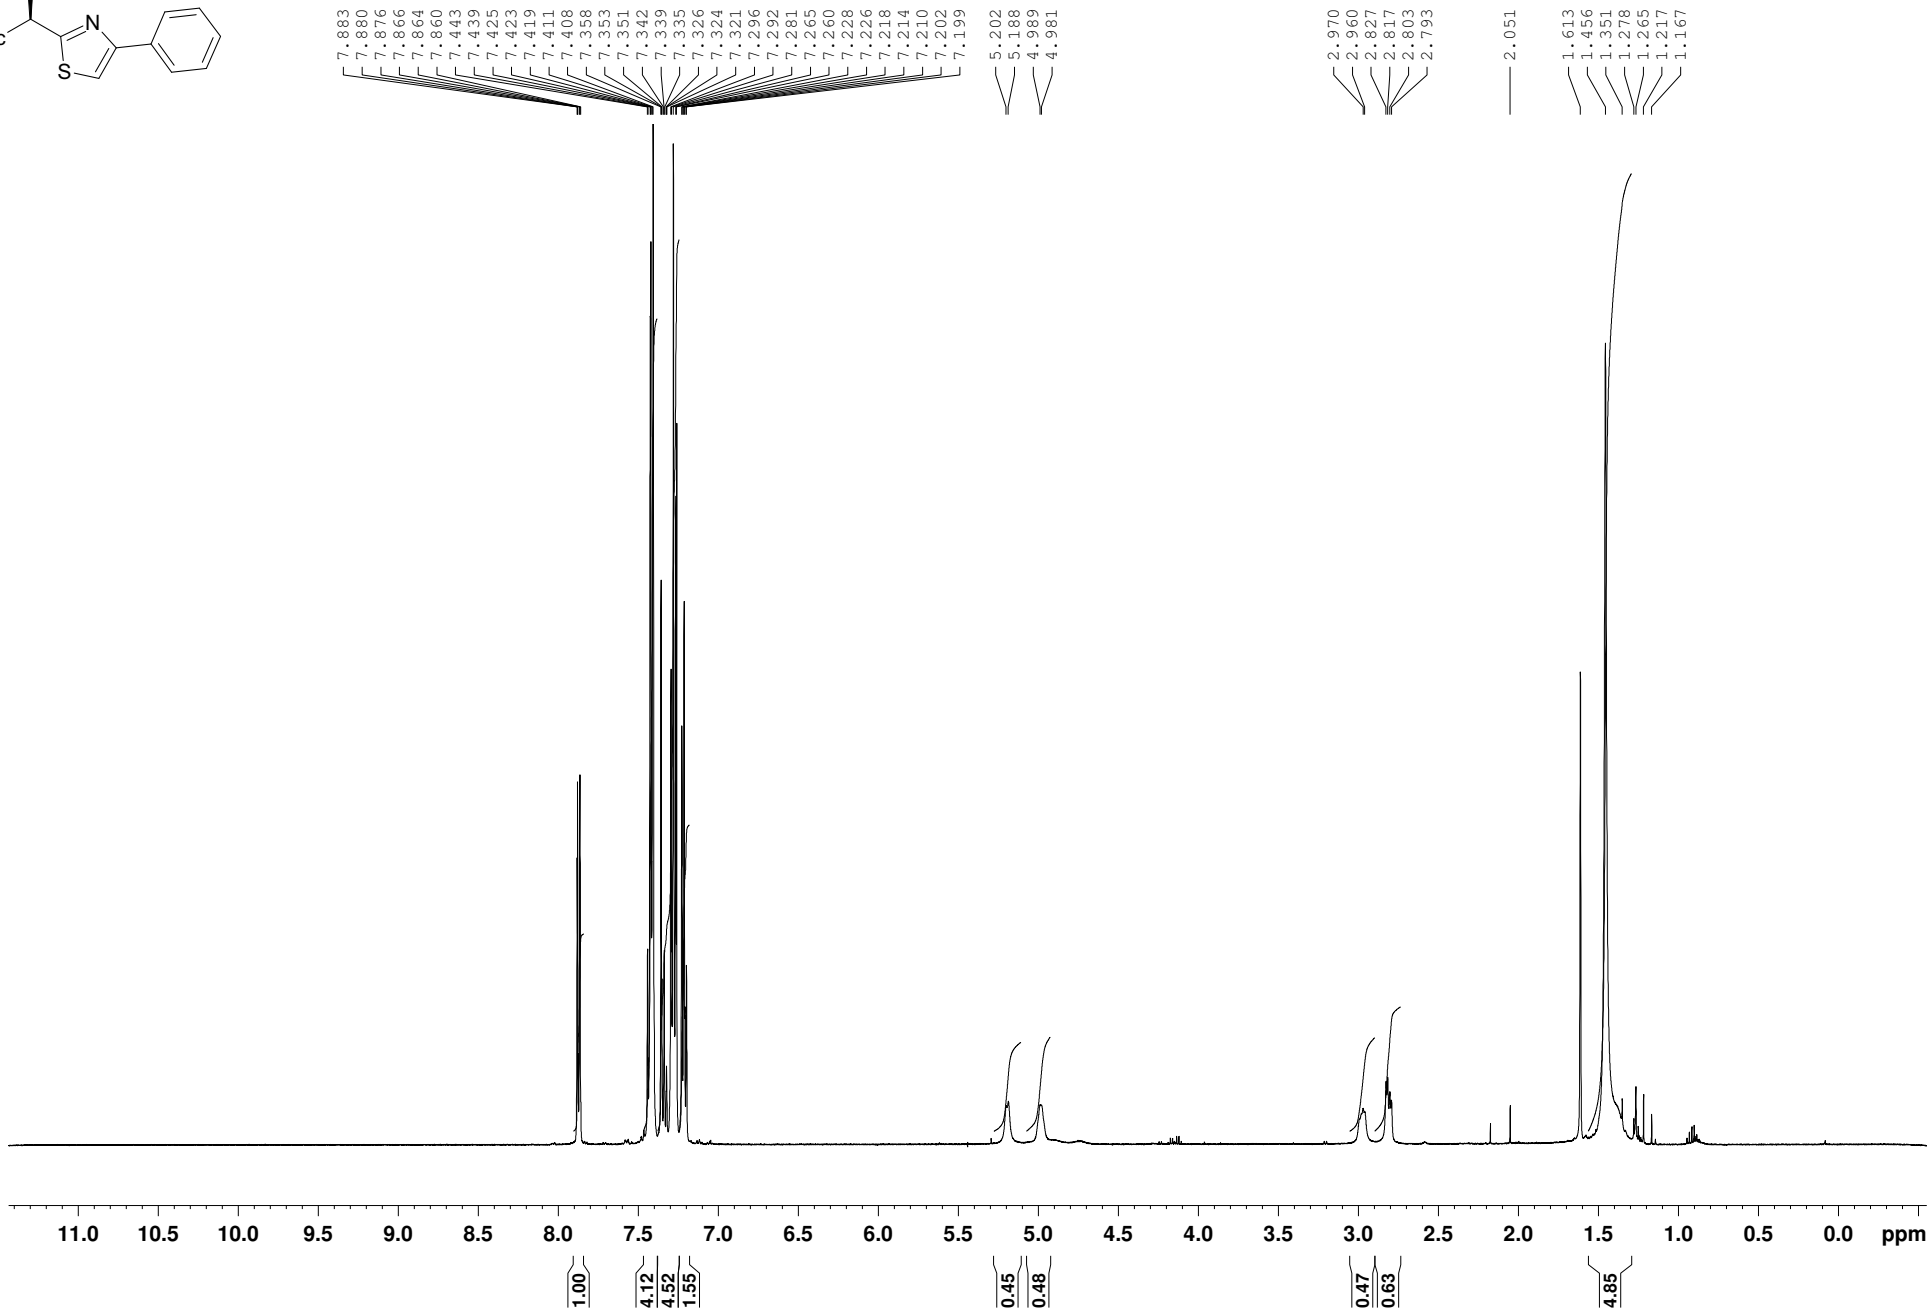

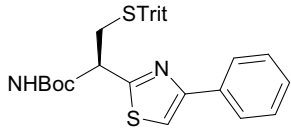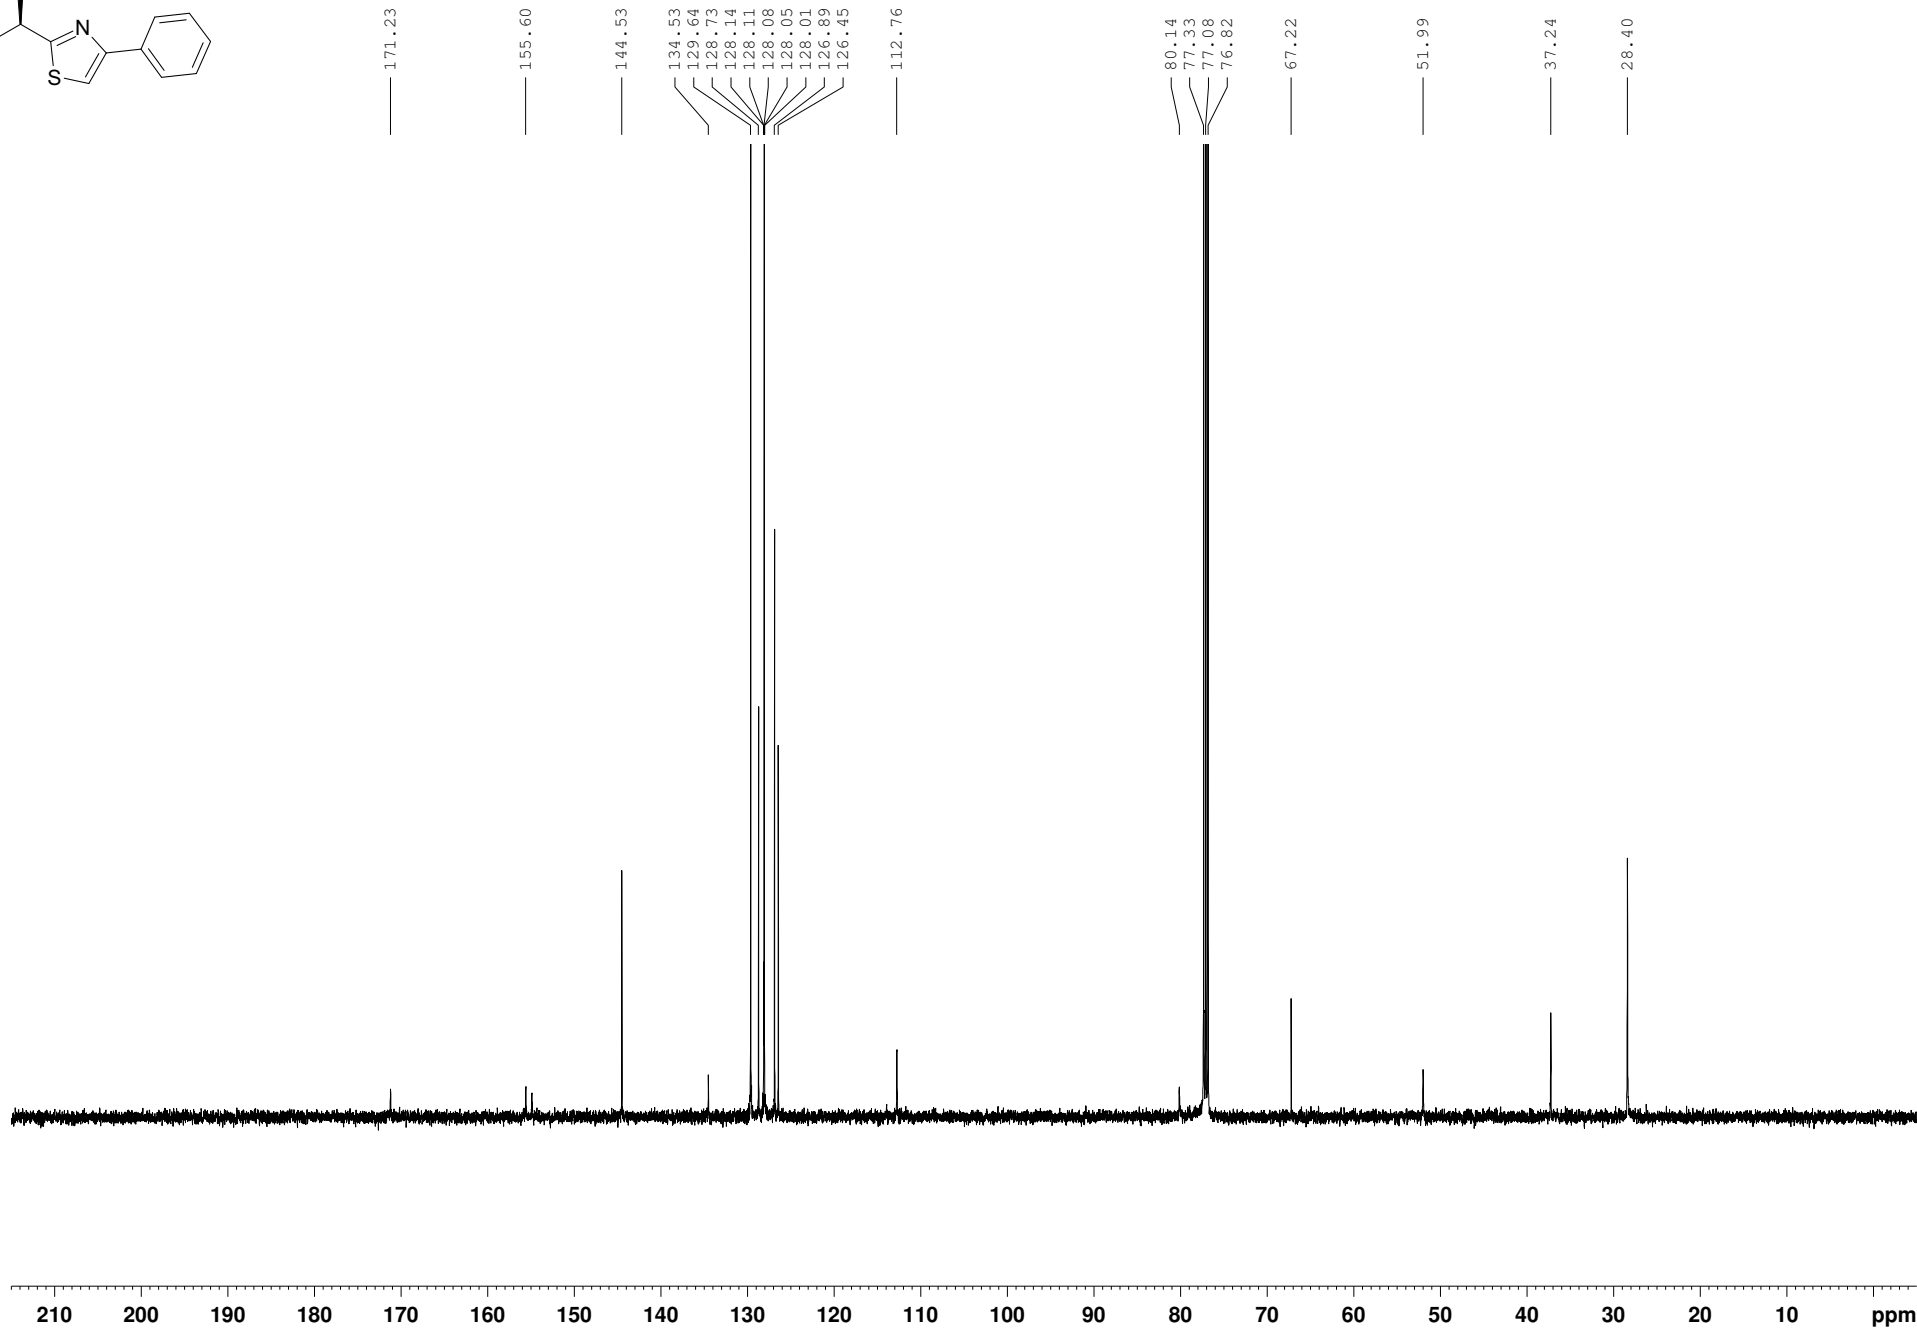

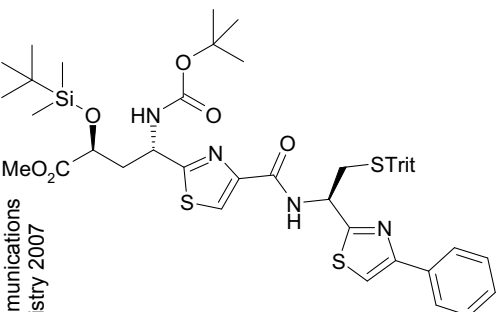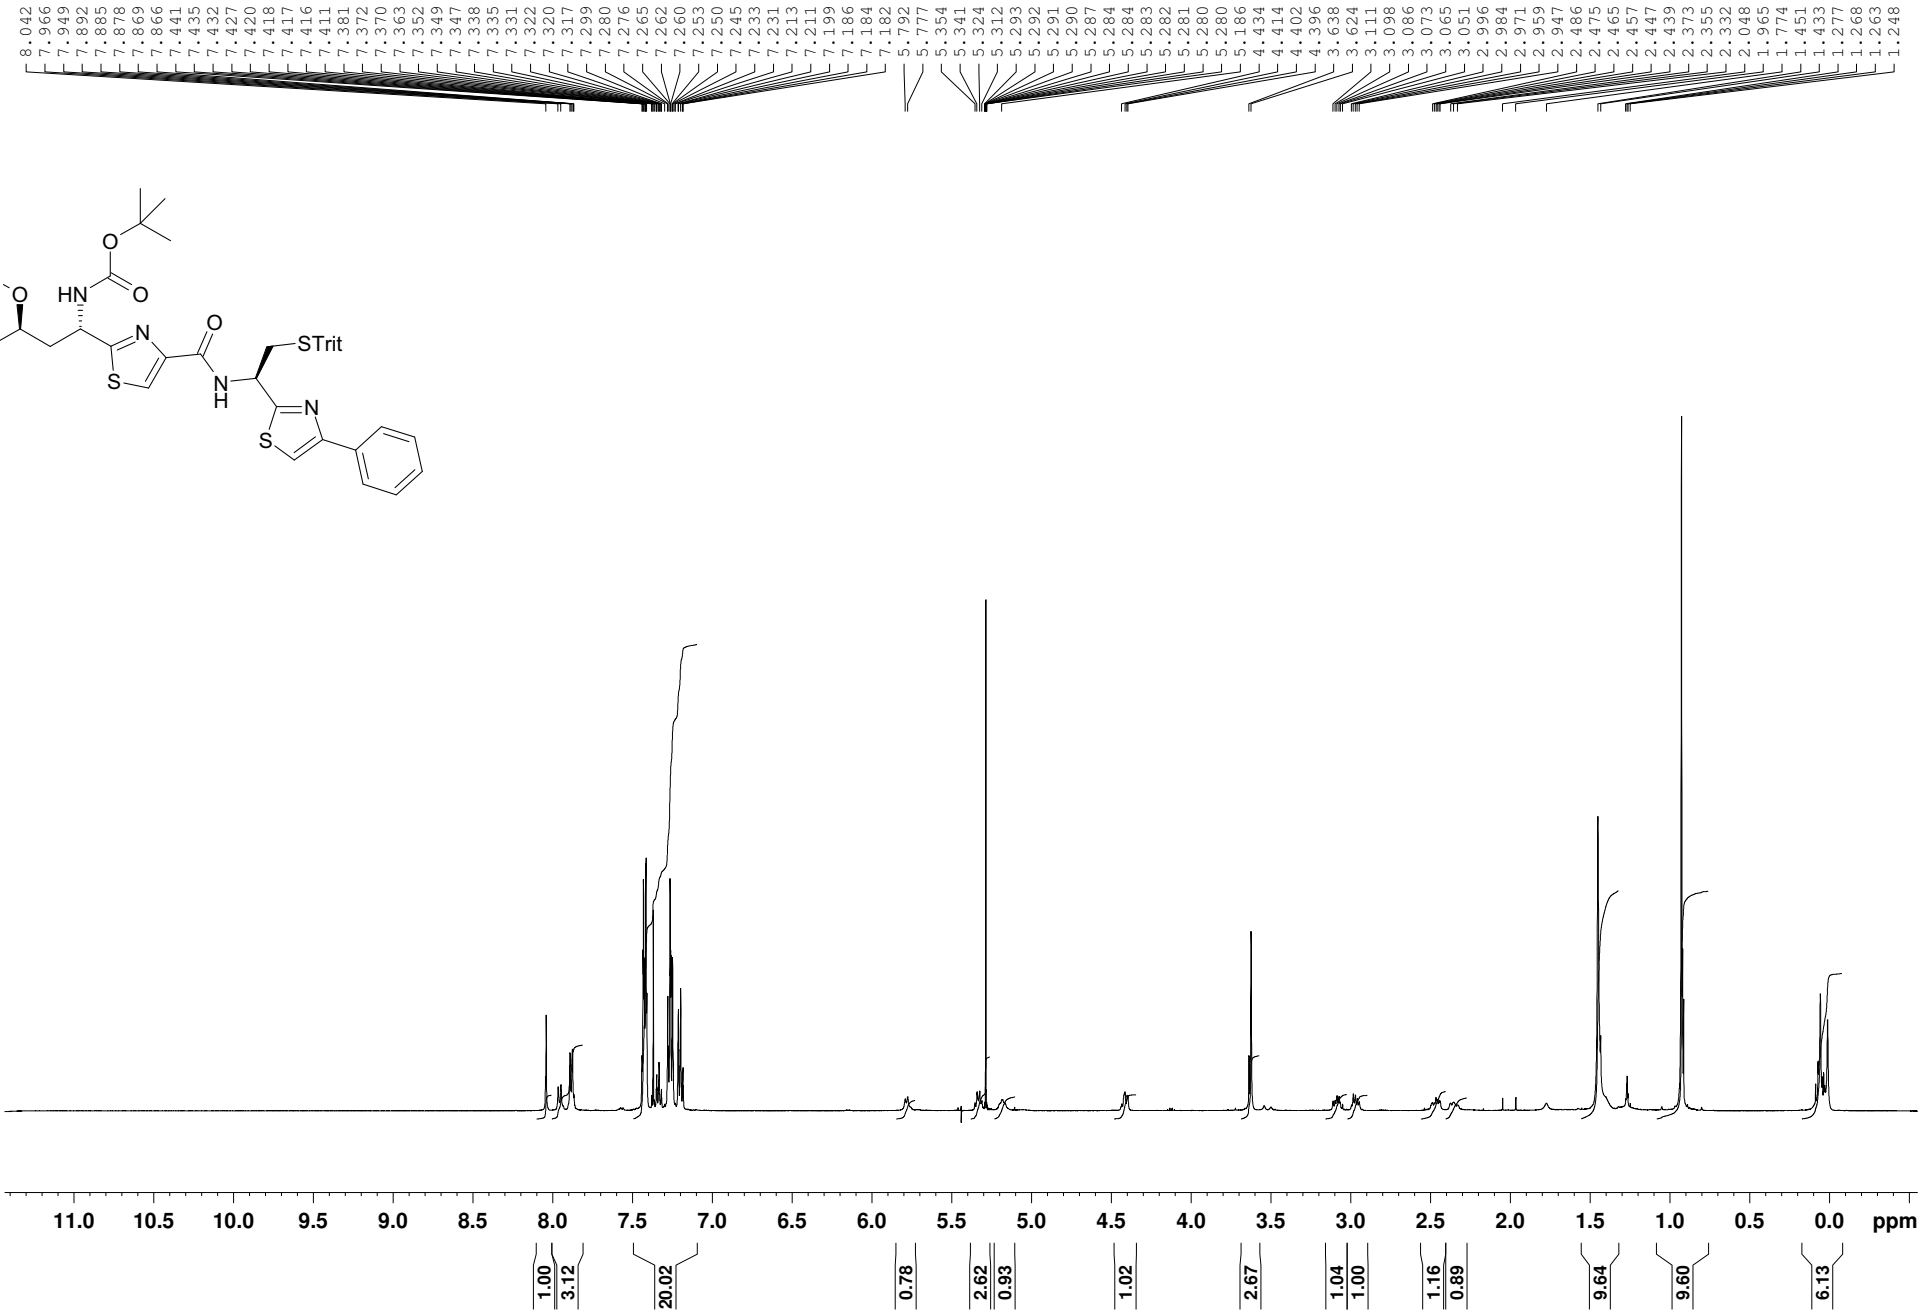

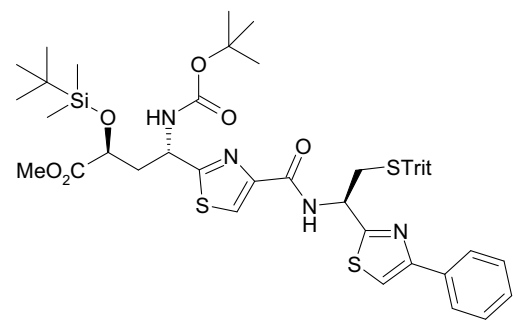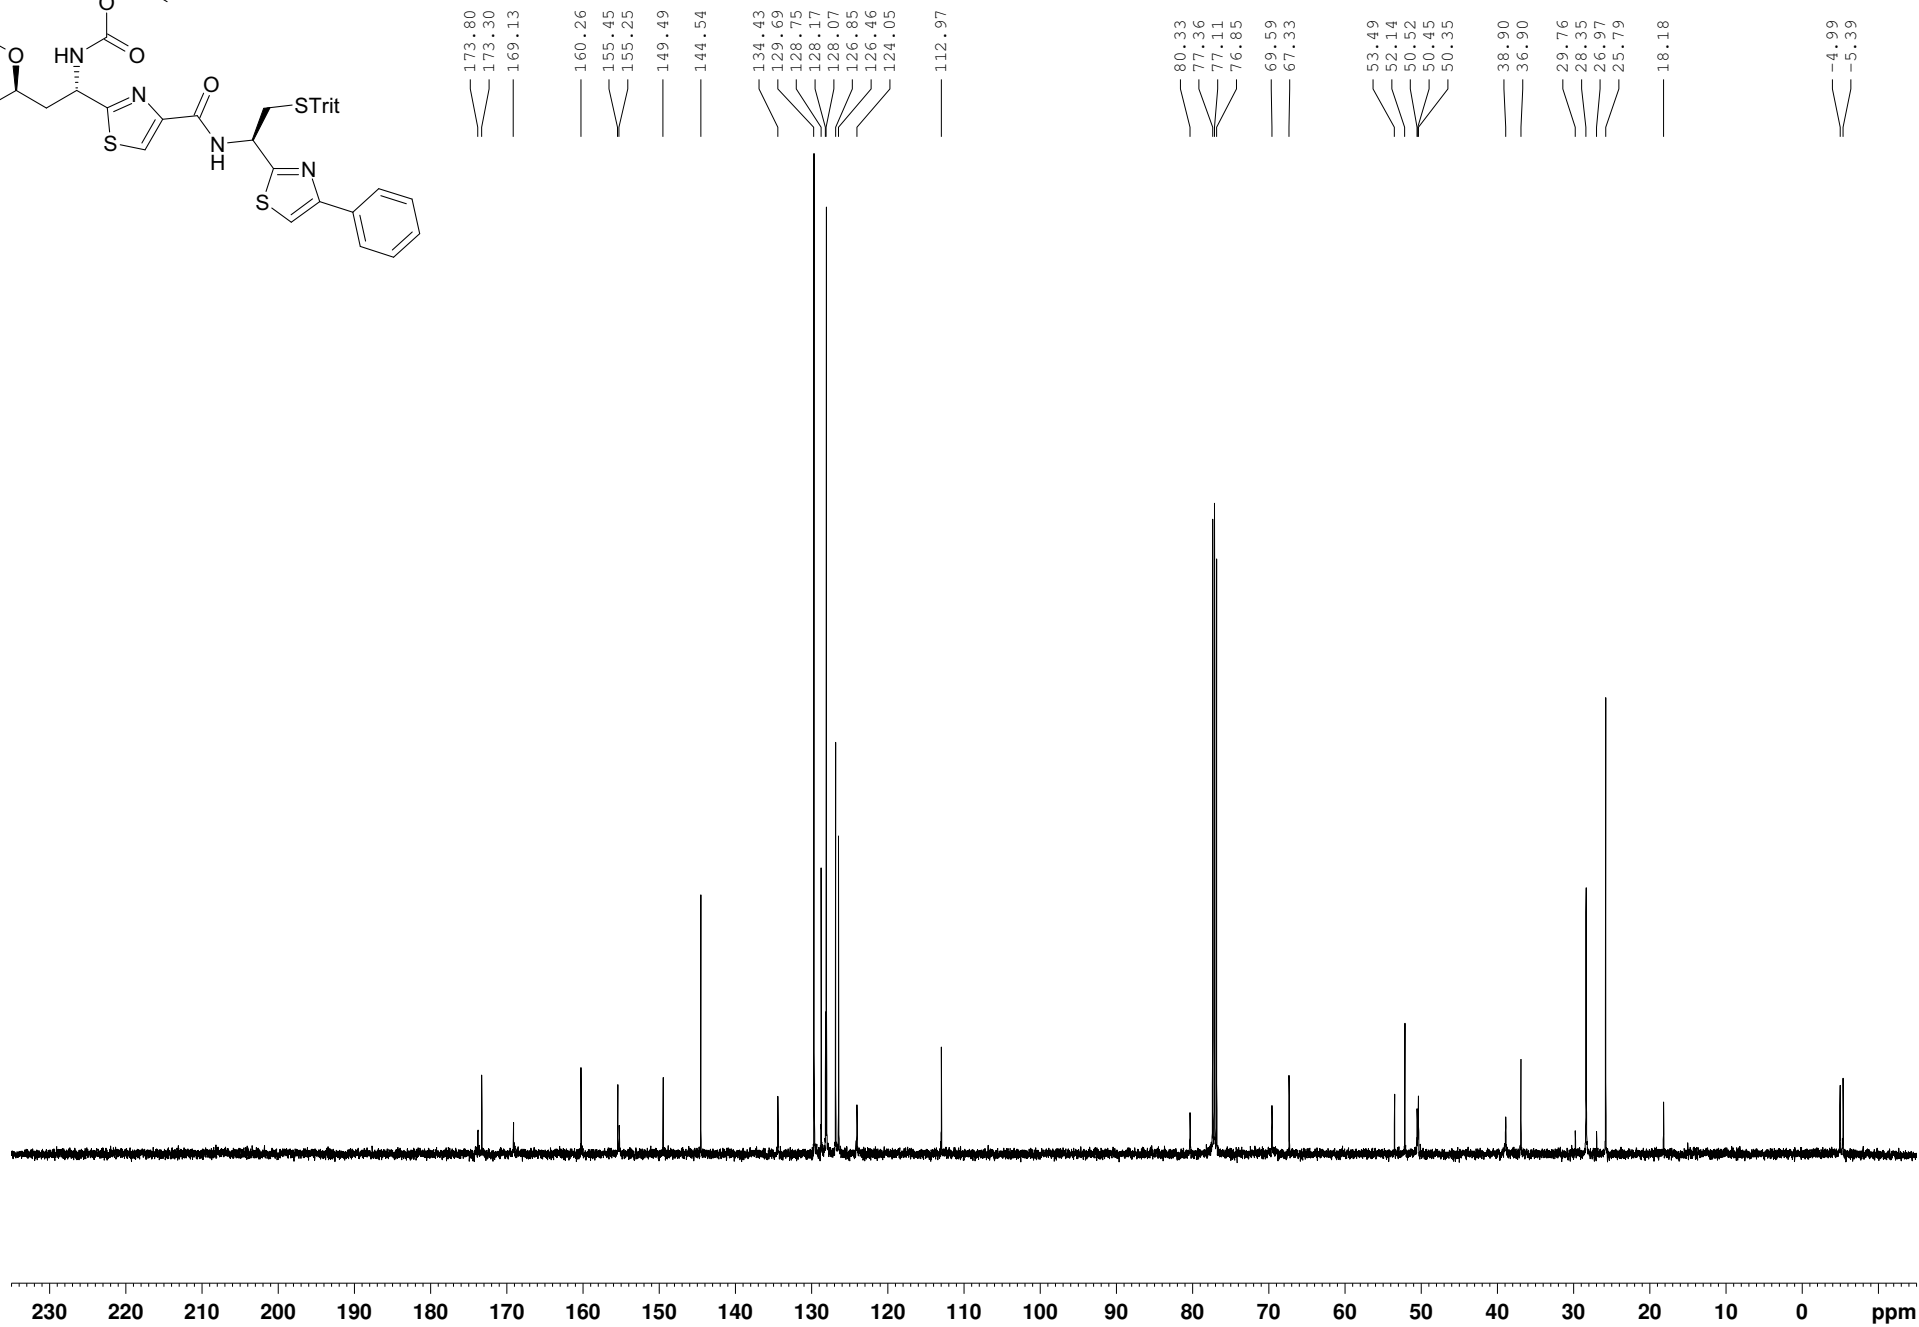



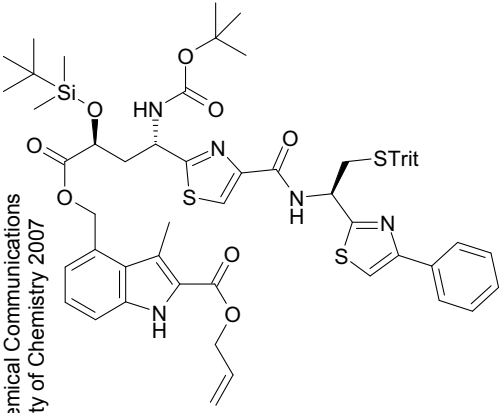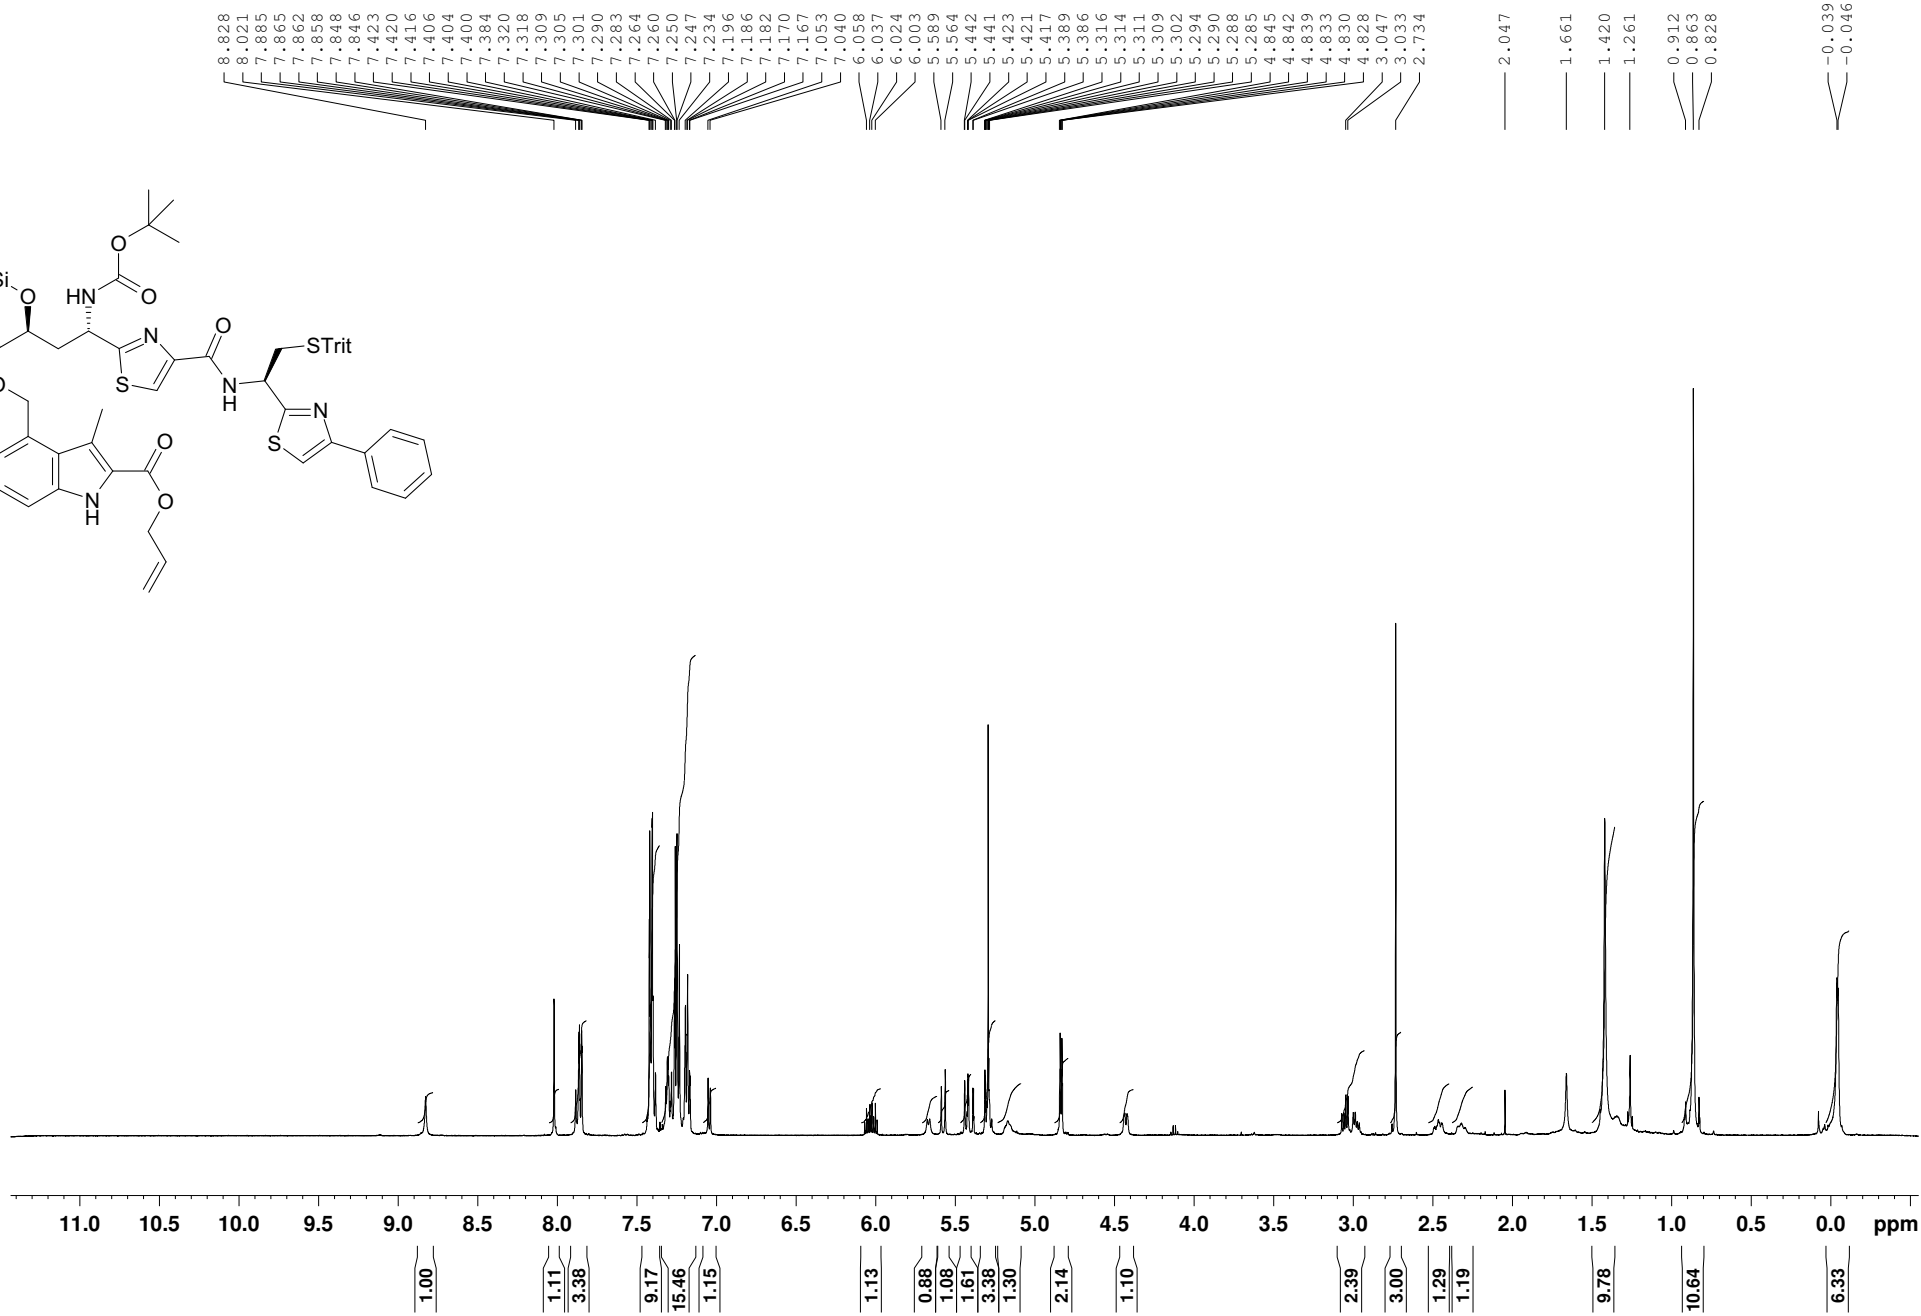

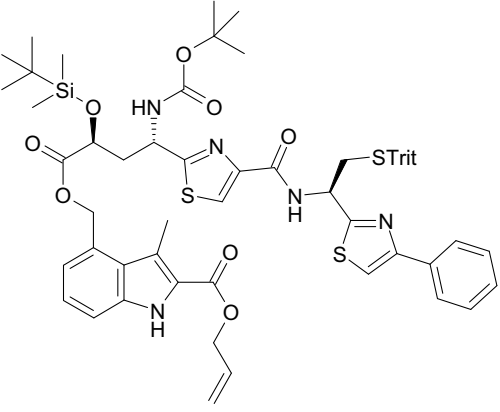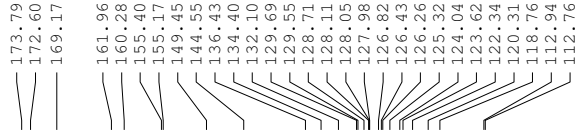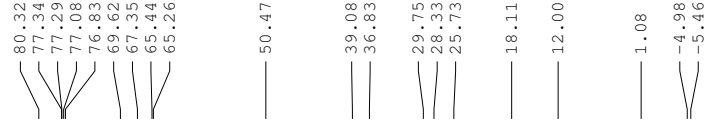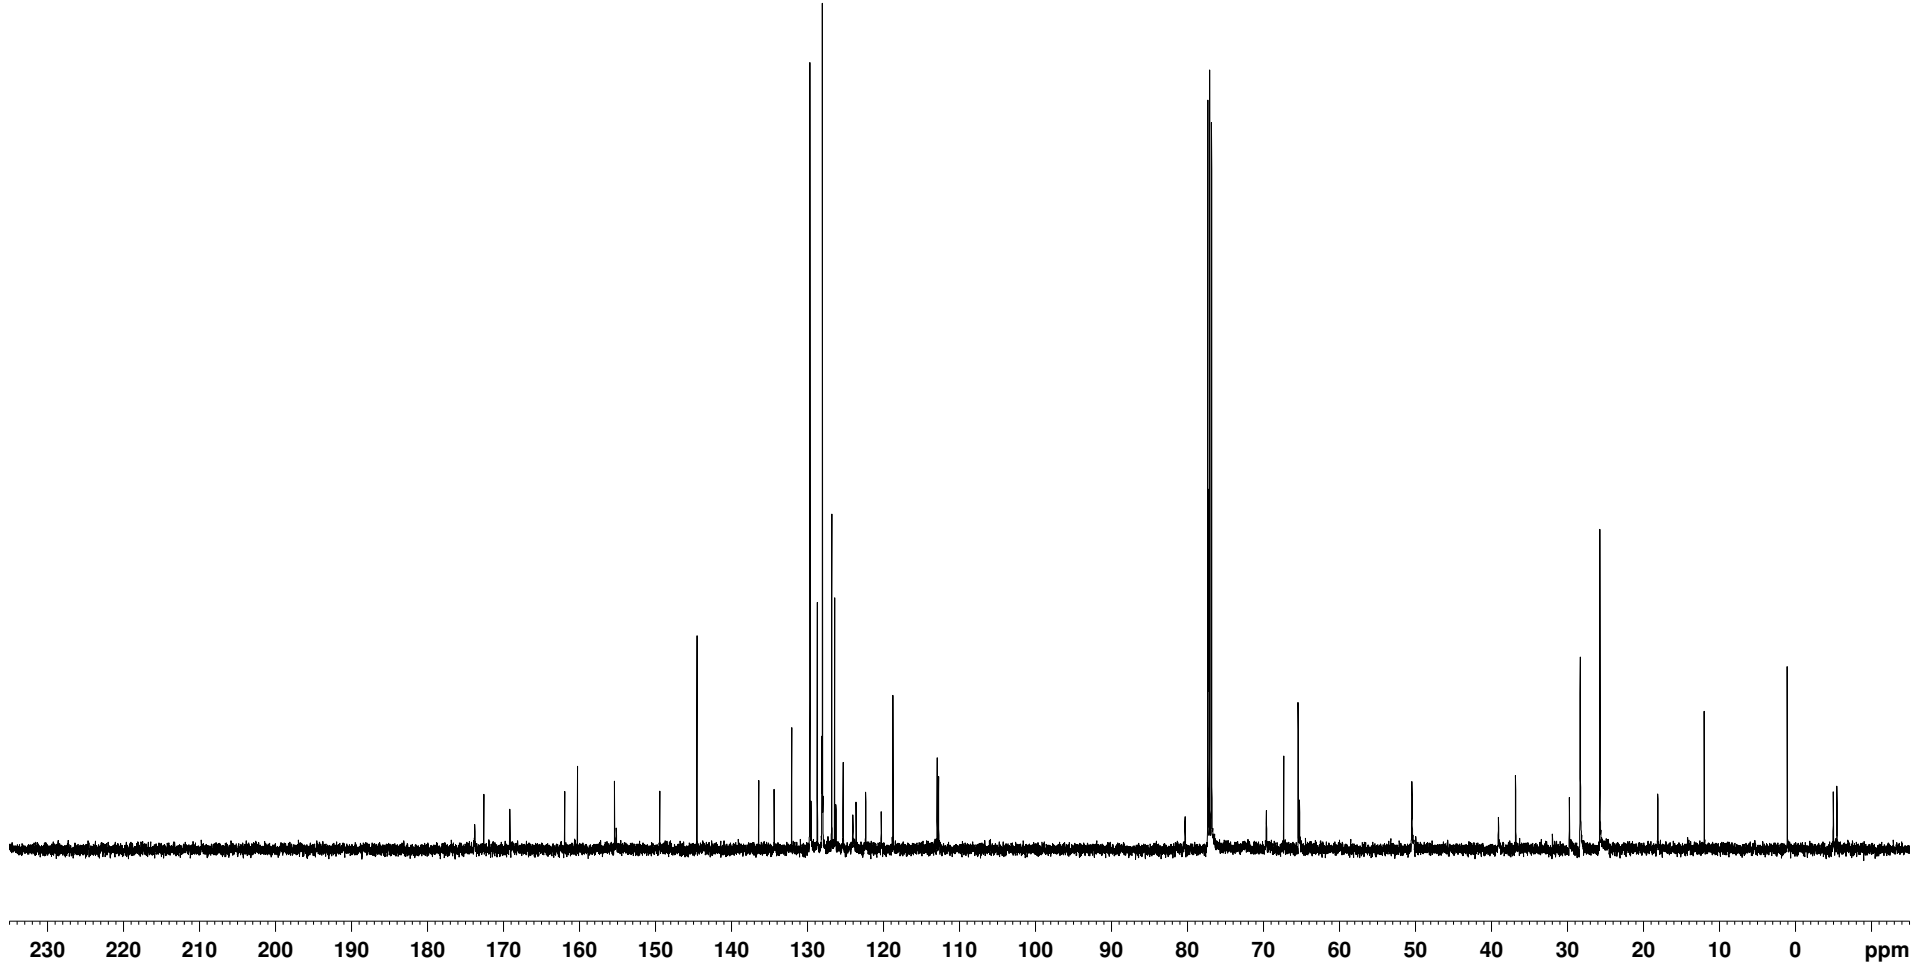

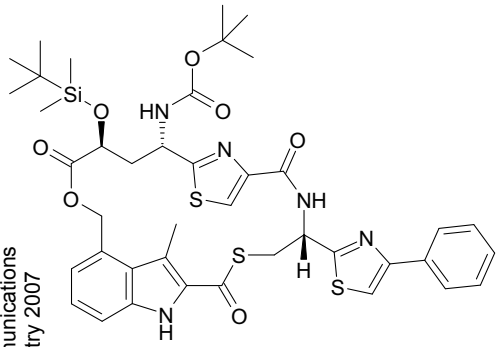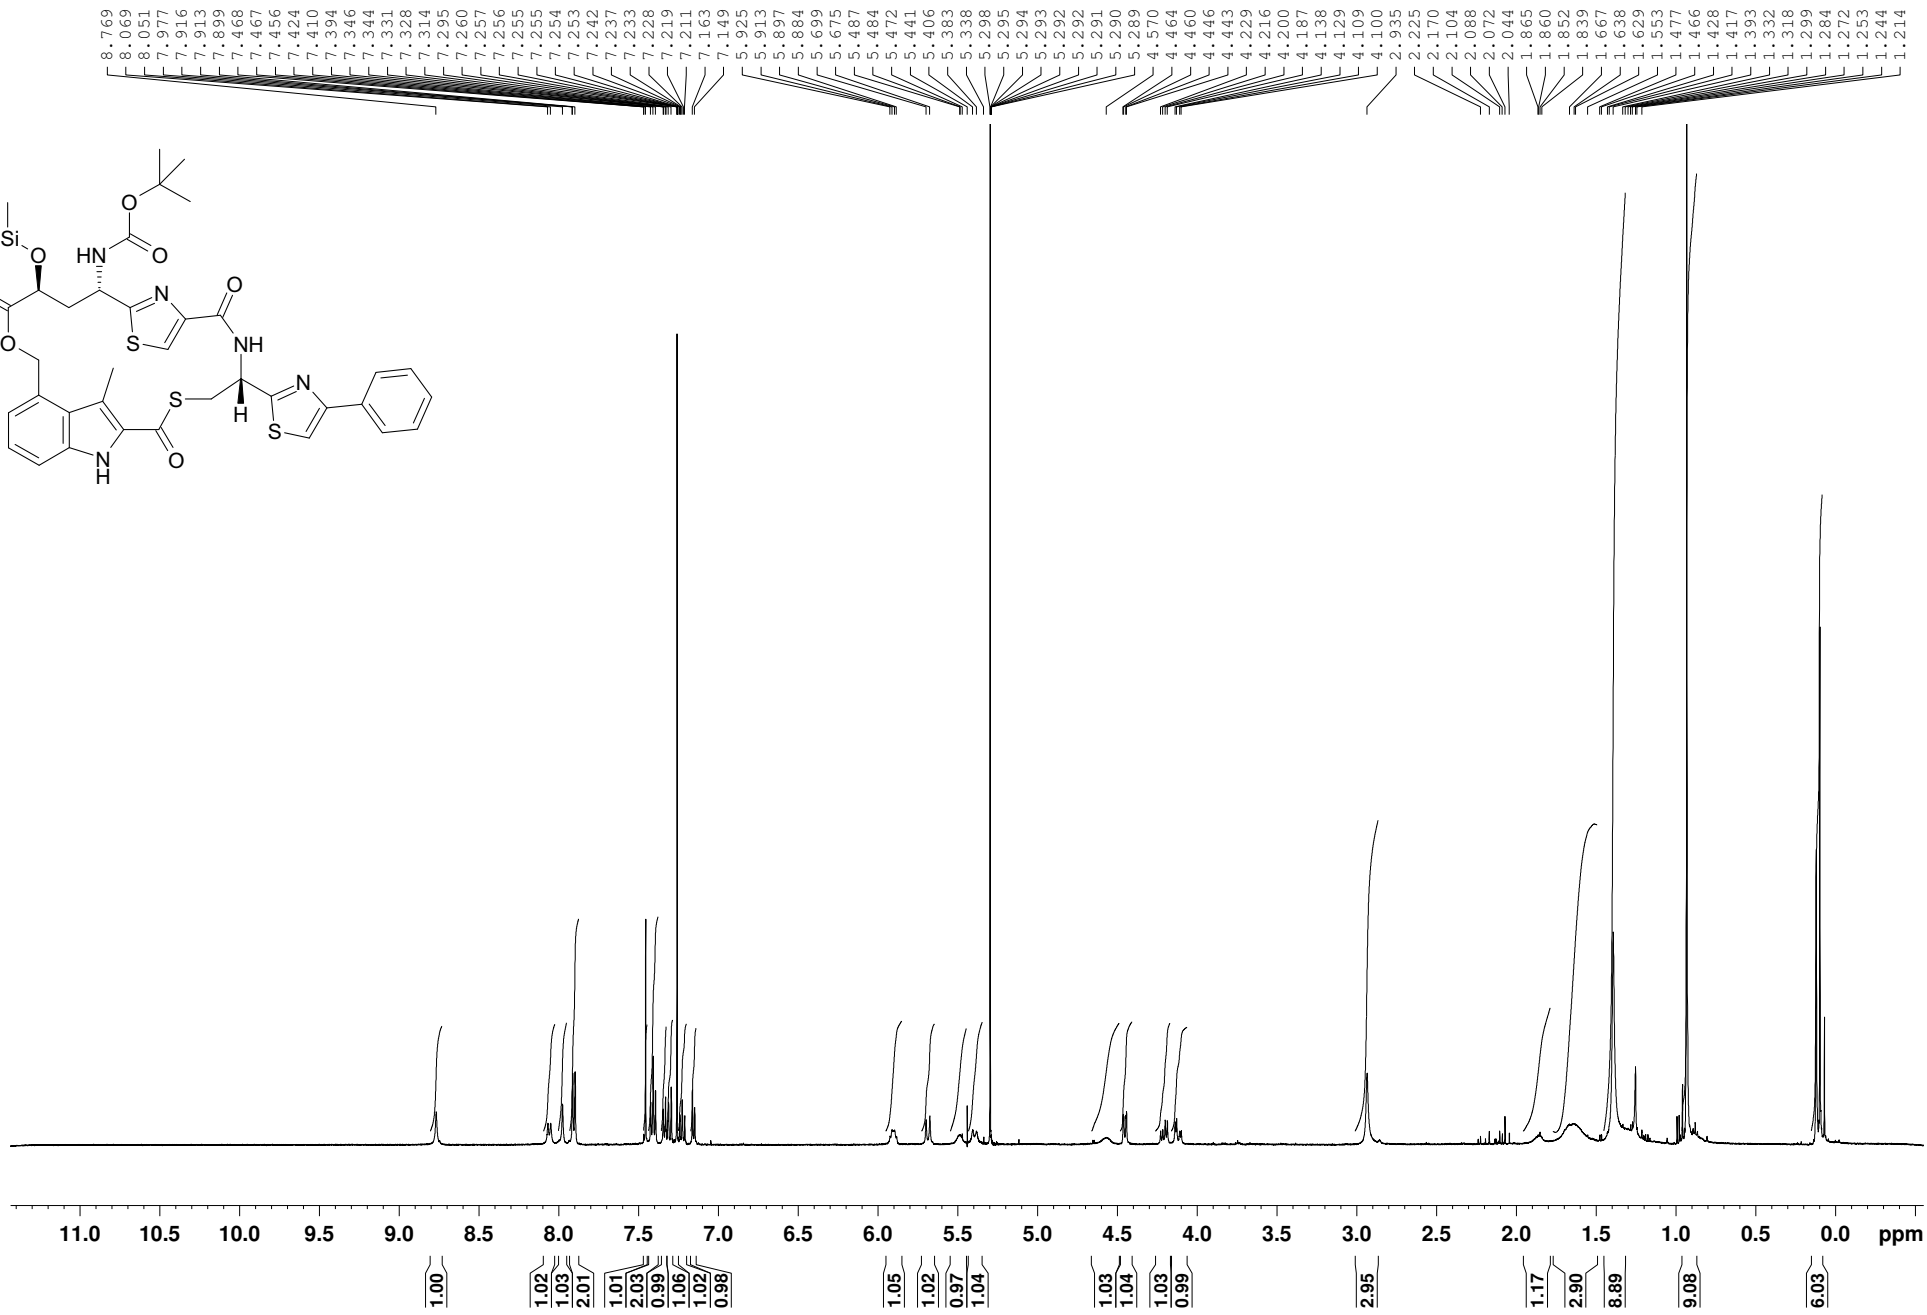

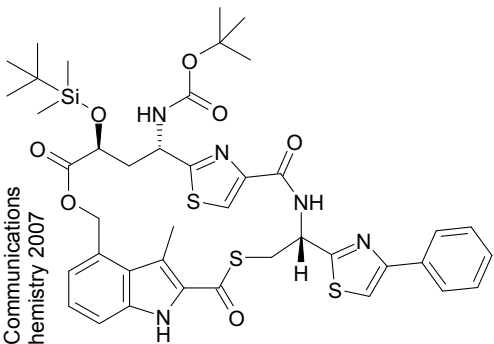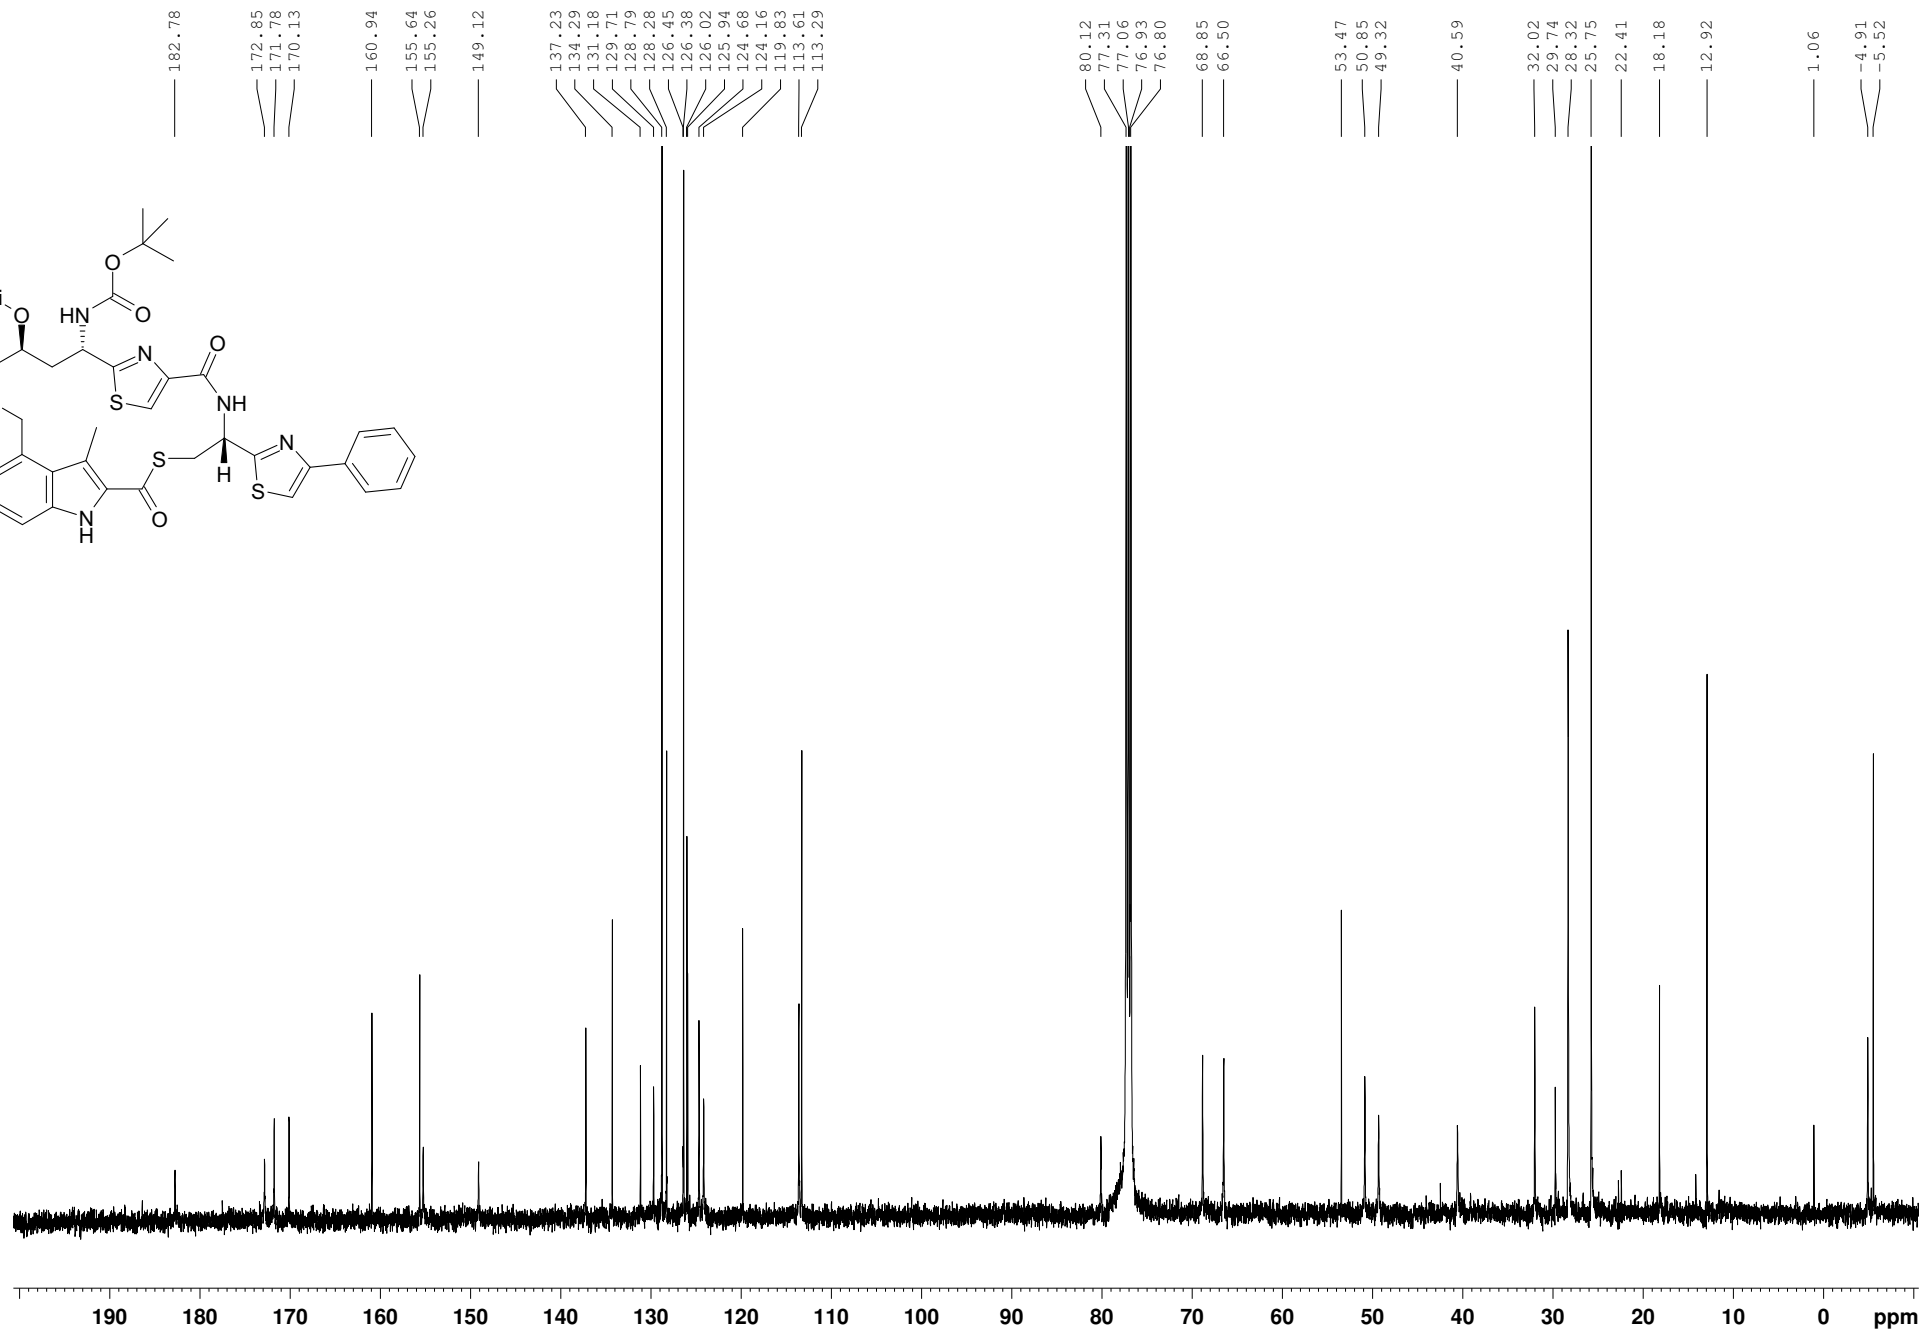

Supplement: esi_spectra.pdf [file esi_spectra.pdf]
